# Supplementary material
Source: PubMed Central journal article supplement (PMC2488249)

Supplementary Figure 1

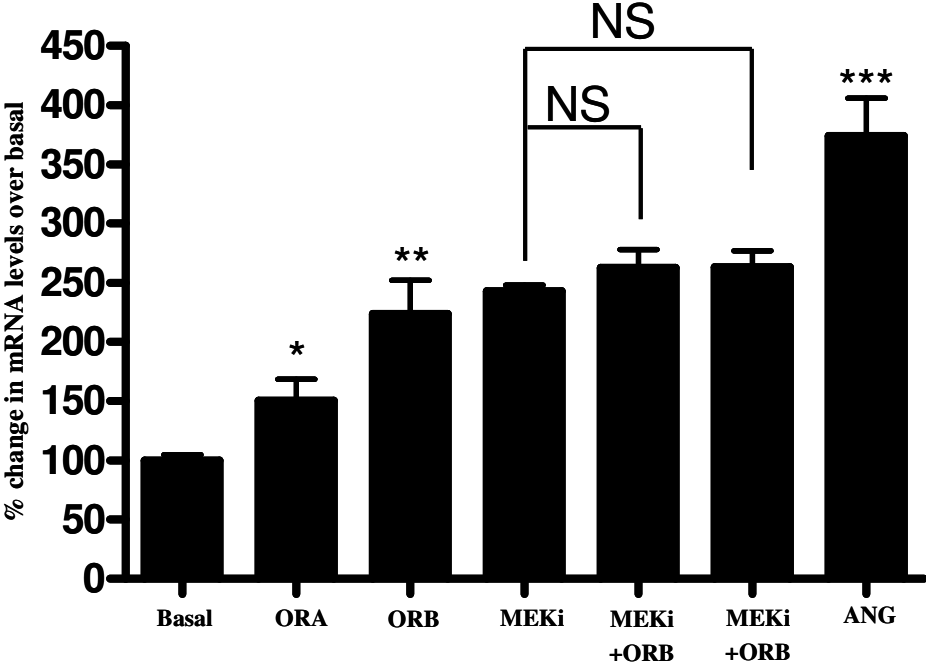

Supplement: en.2007-1739_1.pdf [file en.2007-1739_1.pdf]
